# Supplementary material for: Adjuvant Sirolimus Does Not Improve Outcome in Pet Dogs Receiving Standard-of-Care Therapy for Appendicular Osteosarcoma: A Prospective, Randomized Trial of 324 Dogs
Source: Oxford University Press journal article supplement (doi:10.1158/1078-0432.ccr-21-0315), 2021-03-22
Supplement: 10780432ccr210315-sup-259627_2_supp_6992912_qq4zny.docx [file 10780432ccr210315-sup-259627_2_supp_6992912_qq4zny.docx]

**Supplemental Figure 2**

**
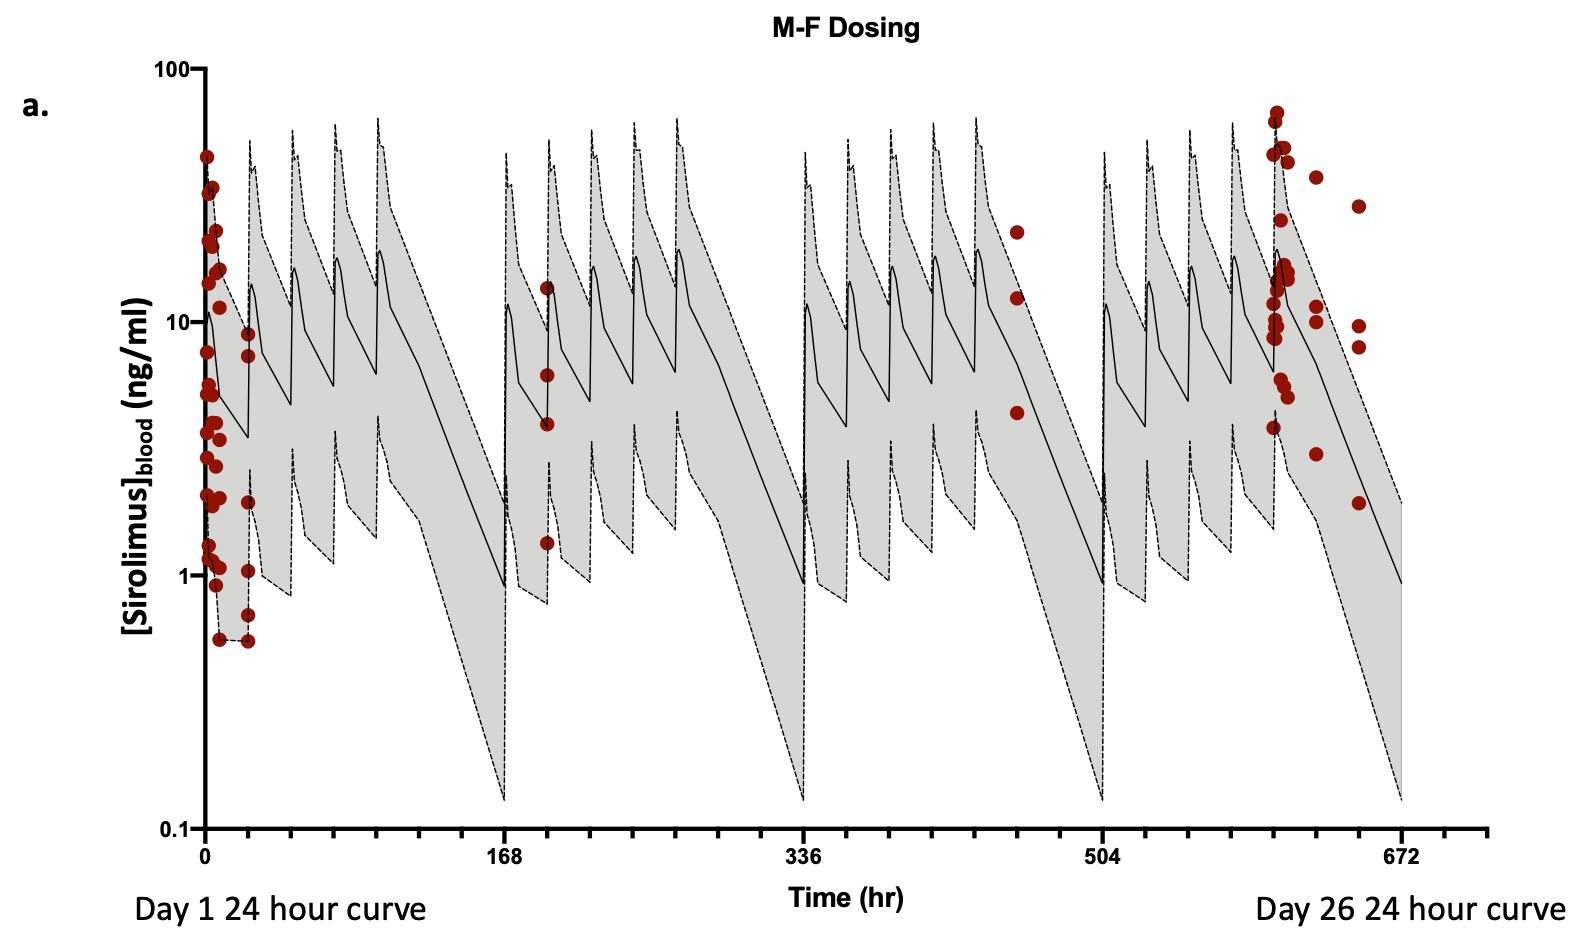
**

**
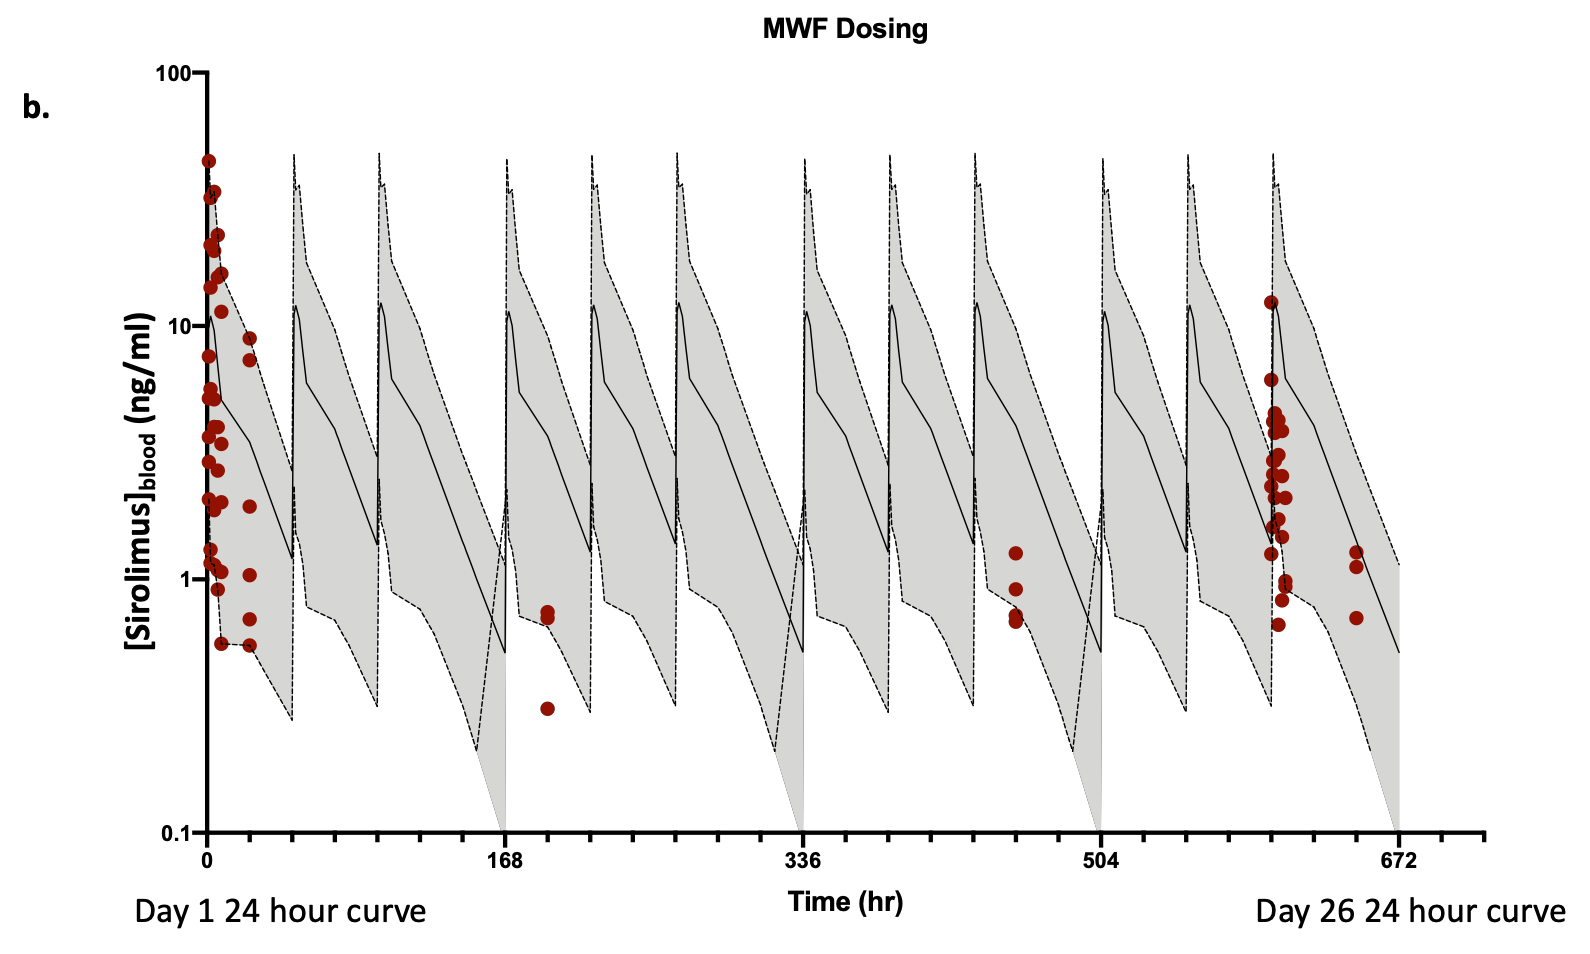
**

**Supplemental Fig 2a.** Red dots represent sirolimus blood levels measured in n = 4 dogs receiving 0.1 mg/kg orally on a Monday through Friday basis within the walk-in sirolimus trial. These data were used to construct a simulated Area under the Curve (AUC) for sirolimus exposure (solid line = simulated mean sirolimus concentration; shaded area bound by dotted lines = simulated range of sirolimus concentration) across the 26 day period. This simulation was conducted to predict, with this dosing strategy, the trough level of sirolimus that could be maintained between doses. **Supplemental Fig 2b.** Red dots represent sirolimus blood levels measured in n = 3 dogs receiving 0.1 mg/kg orally on a Monday, Wednesday and Friday basis within the walk-in sirolimus trial. These data were used to construct a simulated Area under the Curve (AUC) for sirolimus exposure (solid line = simulated mean sirolimus concentration; shaded area bound by dotted lines = simulated range of sirolimus concentration) across the 26 day period. This simulation was conducted to predict, with this dosing strategy, the trough level of sirolimus that could be maintained between doses.
