# Supplementary material for: Adjuvant Sirolimus Does Not Improve Outcome in Pet Dogs Receiving Standard-of-Care Therapy for Appendicular Osteosarcoma: A Prospective, Randomized Trial of 324 Dogs
Source: Oxford University Press journal article supplement (doi:10.1158/1078-0432.ccr-21-0315), 2021-03-22
Supplement: 10780432ccr210315-sup-259627_2_supp_6992943_qq4tnz.xlsx [file 10780432ccr210315-sup-259627_2_supp_6992943_qq4tnz.xlsx]

## Sheet: Supplemental Table 3
Supplemental Table 3: A summary of statistical measures for dogs enrolled in the Standard of Care (SOC) trial arm.
Variable		# of dogs	Median # of days	95% CI	p-value	% Dogs at one year	% Dogs at two years
Disease-free interval (days)	Median	157	180	144, 237		27.5	14.3
DFI anatomic site	Proximal humerus	34	237		0.21
	Non-proximal humerus	123	171
DFI serum ALP	Elevated	39	173		0.48
	Normal	118	180
DFI groups	Non-proximal humeral elevated ALP	26	173		0.13
	Non-proximal humeral normal ALP	97	171
	Proximal humeral elevated ALP	13	168
	Proximal humeral normal ALP	21	321
Evaluable cases DFI	Median	84	333	270, 429		46.3	24
Overall survival time	Median	157	282	224, 383		43.9	24.8
Overall survival anatomic site	Proximal humerus	34	282		0.59
	Non-proximal humerus	123	264
Overall survival serum ALP	Elevated	39	242		0.3
	Normal	118	309
Overall survival groups	Non-proximal humeral elevated ALP	26	247		0.32
	Non-proximal humeral normal ALP	97	309
	Proximal humeral elevated ALP	13	217
	Proximal humeral normal ALP	21	384
Evaluable cases overall survival time	Median	84	589	386, 773		68.5	40.2
